# Supplementary material for: Anthracene labeled poly(pyridine methacrylamide) as a polymer-based chemosensor for detection of pyrophosphate (P2O74−) in semi-aqueous media
Source: Royal Society of Chemistry journal article supplement (doi:10.1039/d0ay01540g), 2020-01-01

## Anthracene labeled poly(pyridine methacrylamide) as polymer-based chemosensors for detection of pyrophosphate ( $P_2O_7^{4-}$ ) in semi-aqueous media

Saswati Ghosh Roy, Subhendu Mondal and Kumares Ghosh\*

Department of Chemistry, University of Kalyani, Kalyani-741235, Nadia, West Bengal, India.

E-mail: ghosh\_k2003@yahoo.co.in; kumareschem18@klyuniv.ac.in

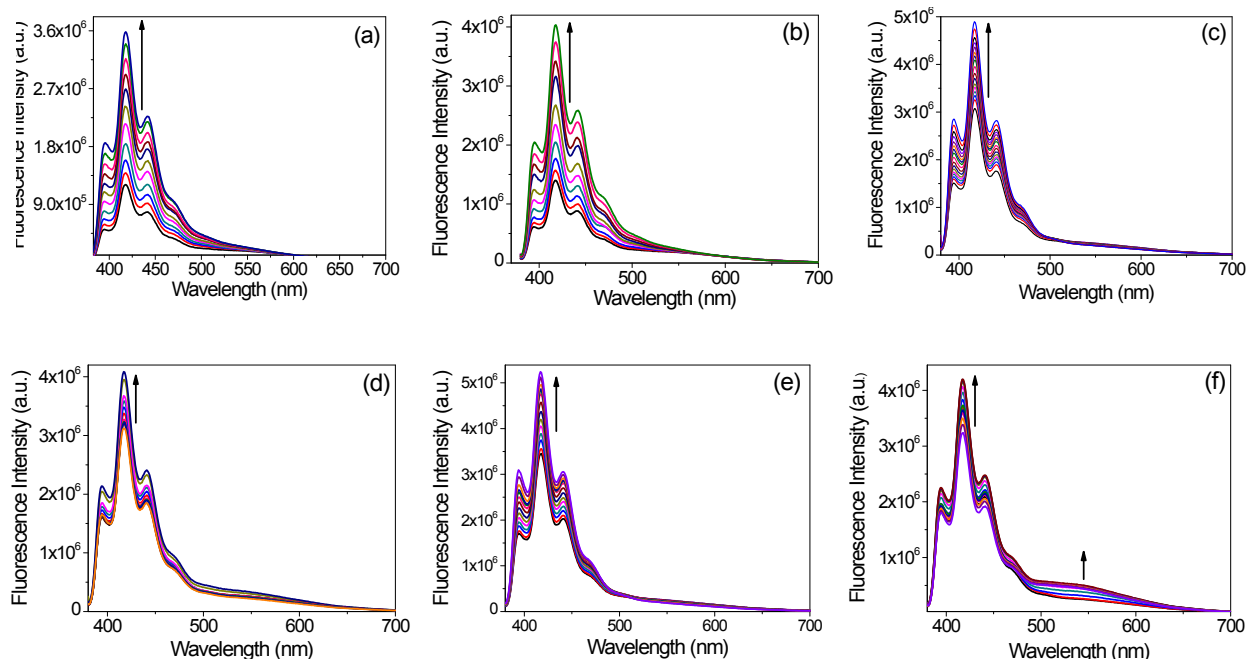

**Fig. S1.** Change in emission of **P1** ( $c = 0.06$  mg/mL) upon successive addition of (a) acetate ( $OAc^-$ ) (b)  $F^-$  (c)  $Cl^-$  (d)  $Br^-$  (e)  $I^-$  and (f)  $HSO_4^-$  (taken as tetrabutyl ammonium salt) ( $c = 1.0 \times 10^{-3}$  M) from 0 to 0.4 mL in DMSO.

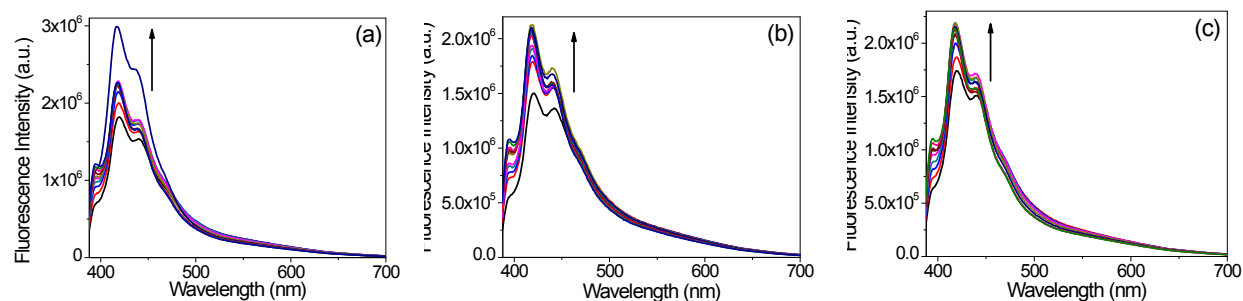

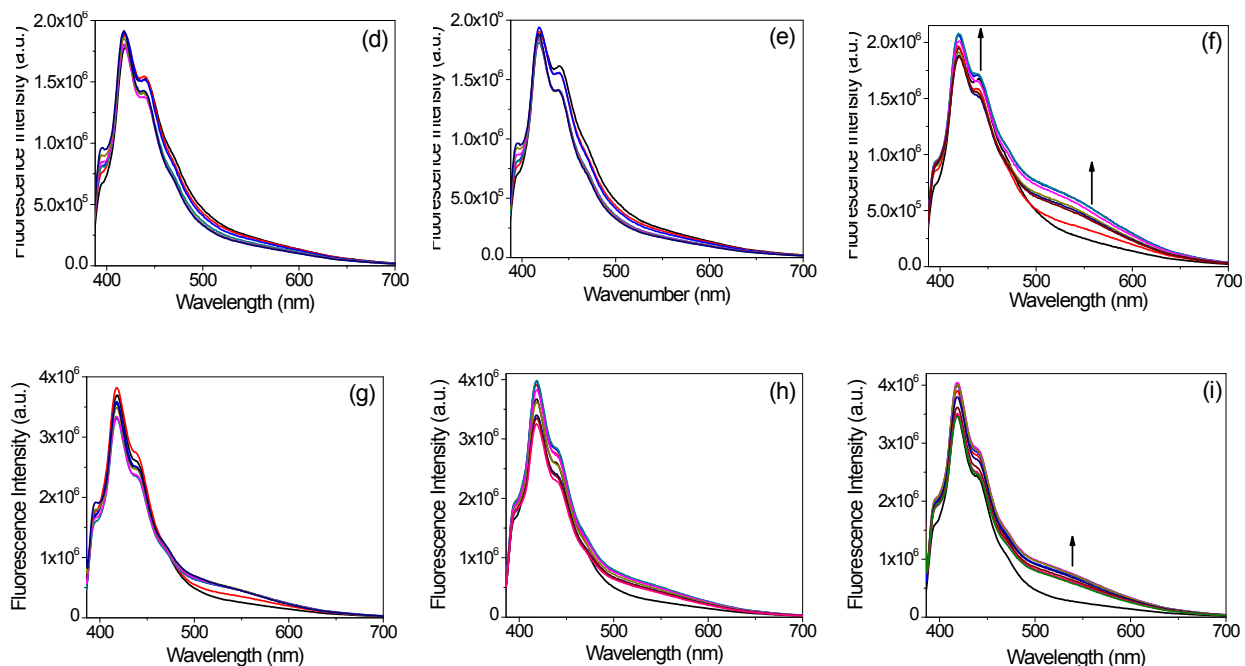

**Fig. S2.** Change in emission of **P1** ( $c = 0.06$  mg/mL,  $\lambda_{\text{ex}} = 370$  nm) upon successive addition of (a) acetate ( $\text{OAc}^-$ ) (b)  $\text{F}^-$  (c)  $\text{Cl}^-$  (d)  $\text{Br}^-$  (e)  $\text{I}^-$ , (f)  $\text{HSO}_4^-$  (g) AMP, (h) ADP and (i) ATP (taken as tetrabutyl ammonium salt) ( $c = 1.0 \times 10^{-3}$  M) from 0 to 0.4 mL in DMSO- $\text{H}_2\text{O}$  (3:1, v/v).

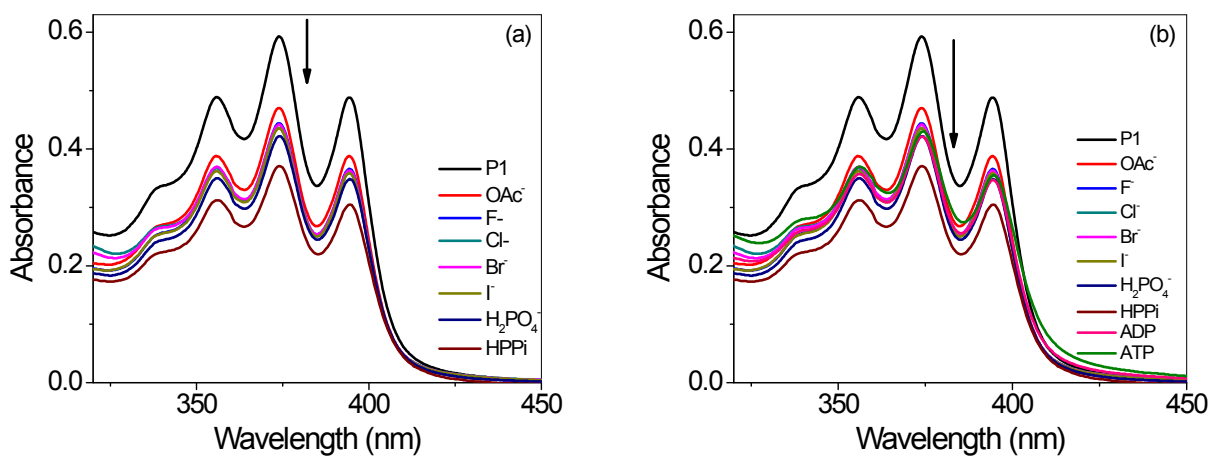

**Fig. S3.** Changes in absorption of **P1** ( $c = 0.06$  mg/mL) upon addition of 0.4 mL solution of various anions (a) ( $\text{OAc}^-$ ,  $\text{F}^-$ ,  $\text{Cl}^-$ ,  $\text{Br}^-$ ,  $\text{I}^-$ ,  $\text{H}_2\text{PO}_4^-$ , HPPi as  $\text{Bu}_4\text{N}$  salt) in DMSO and (b) ( $\text{OAc}^-$ ,  $\text{F}^-$ ,  $\text{Cl}^-$ ,  $\text{Br}^-$ ,  $\text{I}^-$ ,  $\text{H}_2\text{PO}_4^-$ , HPPi, ADP and ATP) in DMSO- $\text{H}_2\text{O}$  ( $c = 1 \times 10^{-3}$  M).

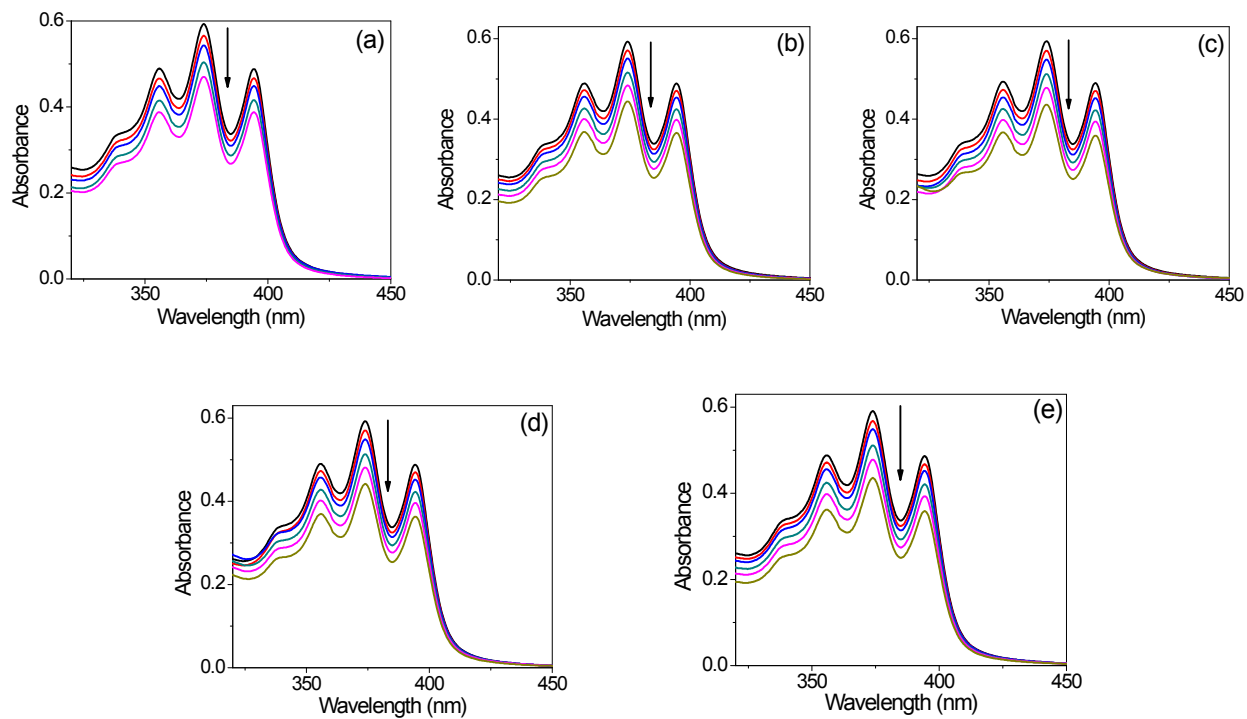

**Fig. S4.** Changes in absorption of P1 ( $c = 0.06$  mg/mL) upon the successive addition of solution of various anions ( $\text{OAc}^-$ ,  $\text{F}^-$ ,  $\text{Cl}^-$ ,  $\text{Br}^-$  and  $\text{I}^-$  from 0 mL to 0.4 mL in DMSO ( $c = 1 \times 10^{-3}$  M).

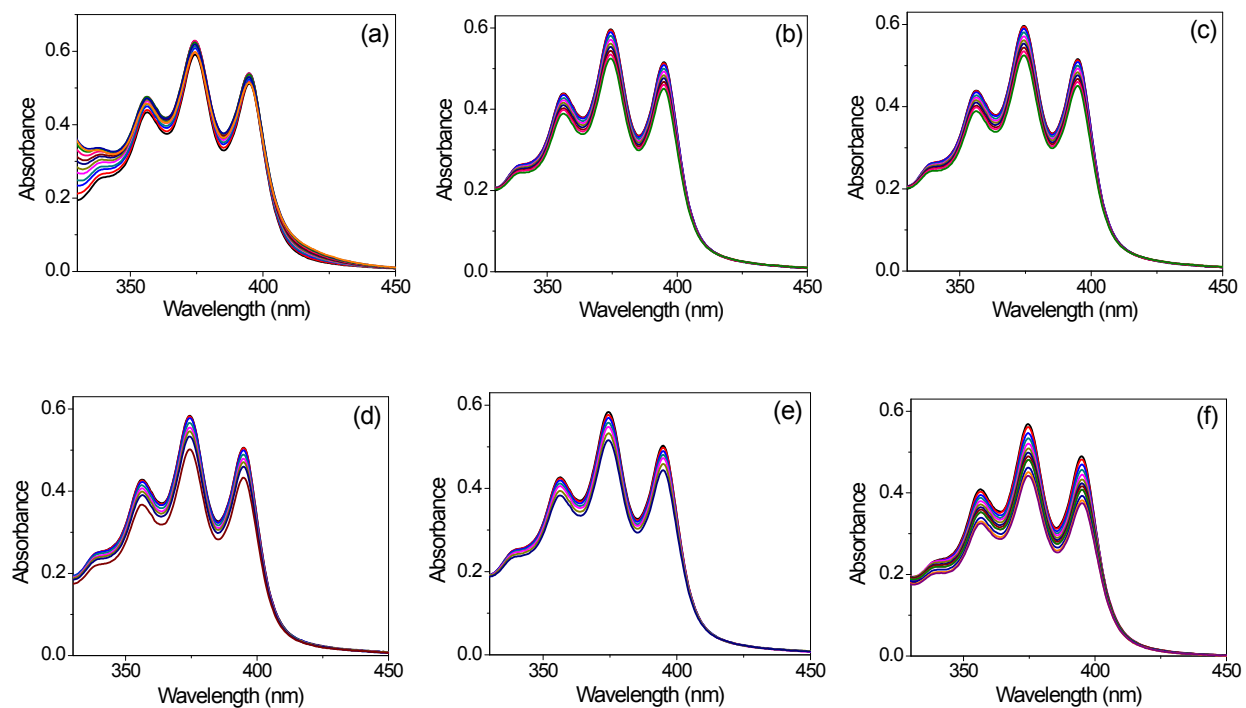

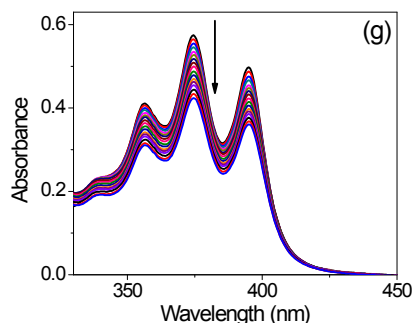

**Fig. S5.** Changes in absorption of **P1** ( $c = 0.06$  mg/mL) upon the successive addition of solution of various anions ( $\text{OAc}^-$ ,  $\text{F}^-$ ,  $\text{Cl}^-$ ,  $\text{Br}^-$ ,  $\text{I}^-$ , ADP and ATP from 0 mL to 0.4 mL in DMSO- $\text{H}_2\text{O}$  ( $c = 1 \times 10^{-3}$  M).

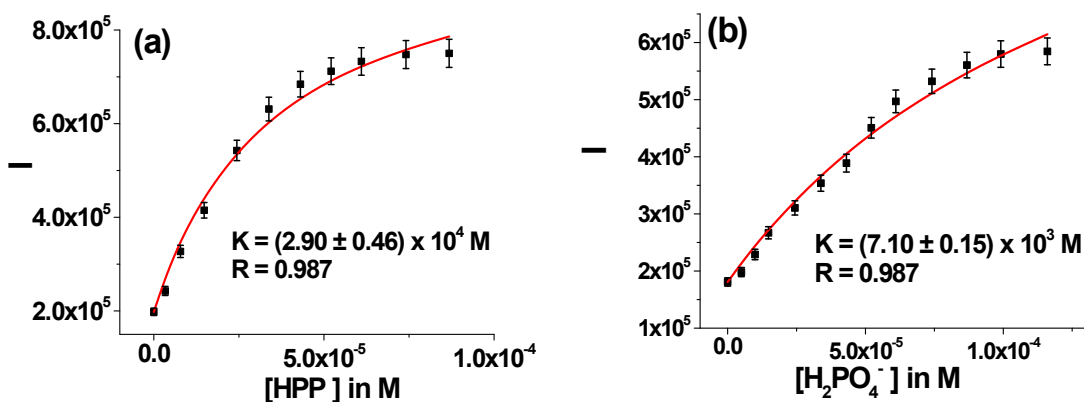

**Fig. S6.** Binding constant curves for **P1** with (a) hydrogen pyrophosphate and (b) dihydrogen phosphate from non-linear fitting of fluorescence titration data in DMSO at 520 nm.

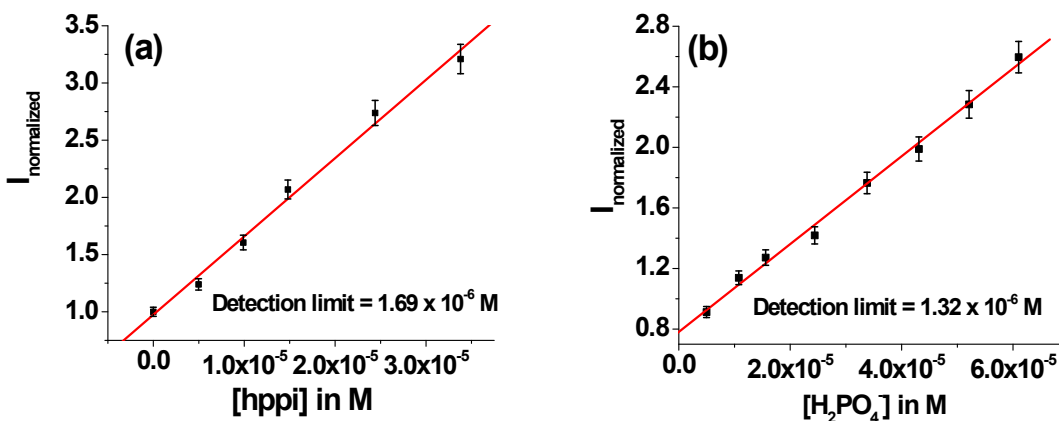

**Fig. S7.** Detection limits for polymer **P1** ( $c = 0.06$  mg/mL) with (a) HPPi and (b)  $\text{H}_2\text{PO}_4^-$  ( $c = 1.0 \times 10^{-3}$  M) ions in DMSO.

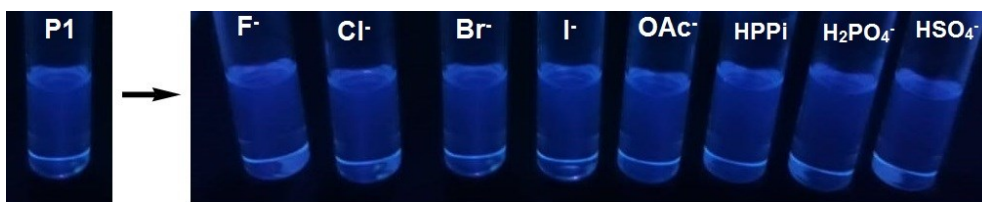

**Fig. S8.** Photograph showing solution of **P1** in absence and presence of 0.4 mL solution of various anions ( $c = 1.0 \times 10^{-3}$  M) as tetrabutylammonium salts in DMSO-H<sub>2</sub>O (3:1, v/v), ( $[P1] = 0.06$  mg/mL) under hand held UV light.

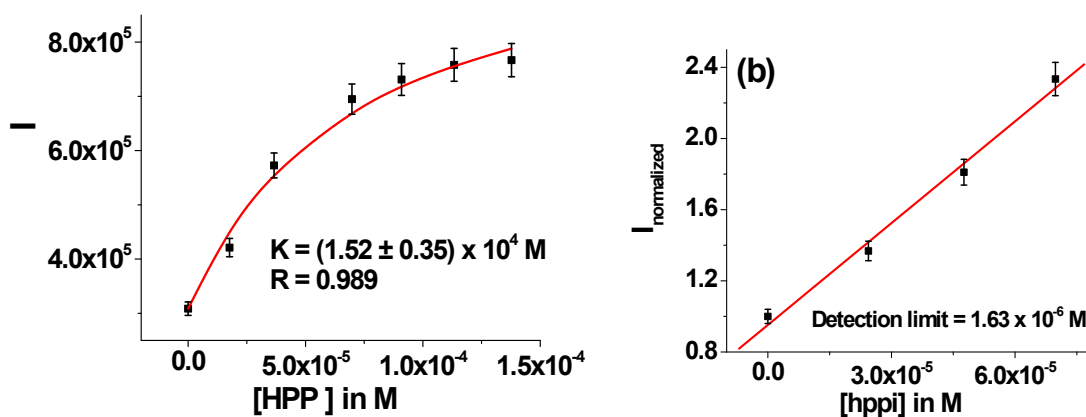

**Fig. S9.** (a) Binding constant curve for **P1** with hydrogen pyrophosphate from non-linear fitting of fluorescence titration data in DMSO-H<sub>2</sub>O (3:1, v/v) at 530 nm and (b) detection limit for **P1** ( $c = 0.06$  mg/mL) with HPPi ( $c = 1.0 \times 10^{-3}$  M) in DMSO-H<sub>2</sub>O (3:1, v/v).

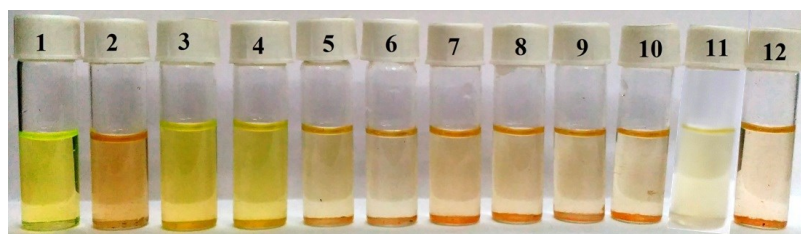

**Fig. S10.** Photograph showing (1) Uranine dye, (2) dye + 0.3 mL polymer solution (1 mg/mL), ensemble with (3) PPI, (4) HPPi, (5) H<sub>2</sub>PO<sub>4</sub><sup>-</sup>, (6) OAc<sup>-</sup>, (7) F<sup>-</sup>, (8) Cl<sup>-</sup>, (9) Br<sup>-</sup>, (10) I<sup>-</sup>, (11) HSO<sub>4</sub><sup>-</sup> and (12) NO<sub>3</sub><sup>-</sup> in DMSO/H<sub>2</sub>O (1:1 v/v, pH = 6.8, 10 mM Tris HCl buffer) [anions were taken as tetrabutylammonium salt and pyrophosphate as sodium salt].

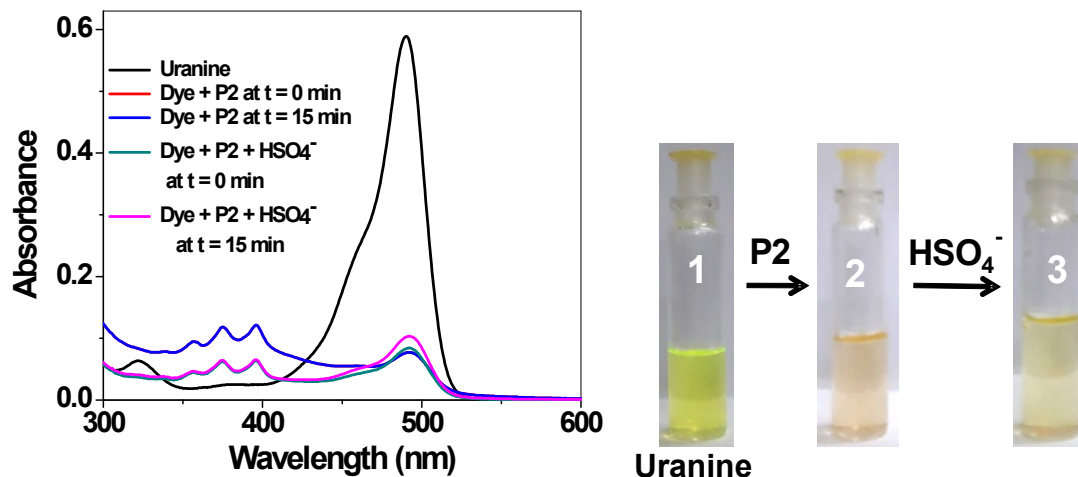

**Fig. S11.** Change in absorbance of uranine dye upon addition of 0.3 mL of **P2** solution and absorbance of **P2**-dye ensemble after addition 0.6 ml amounts of HSO<sub>4</sub><sup>-</sup> ( $c = 5 \times 10^{-3}$  M) to the ensemble in DMSO-H<sub>2</sub>O (1:1 v/v, pH = 6.8, 10 mM TrisHCl buffer) ([dye] =  $2.5 \times 10^{-5}$  M, [polymer **P2**] = 0.06 mg/mL) (left); Photograph showing color of (1) Uranine dye, (2) dye + 0.3 mL of **P2** polymer ensemble and (3) ensemble treated with HSO<sub>4</sub><sup>-</sup> [HSO<sub>4</sub><sup>-</sup> taken as tetrabutylammonium salt] (right).

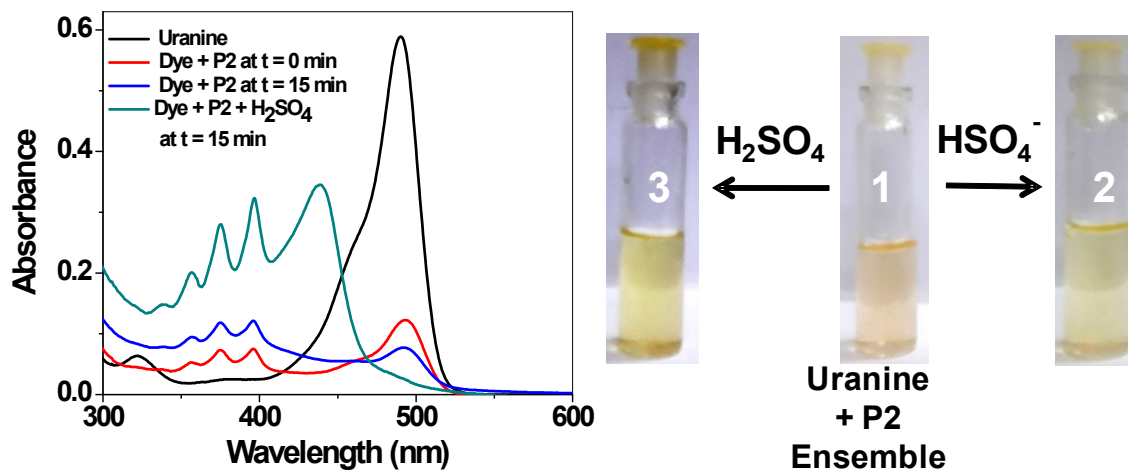

**Fig. S12.** Change in absorbance of uranine dye upon addition of 0.3 mL of **P2** solution and absorbance of **P2**-dye ensemble after addition 0.6 ml amounts of H<sub>2</sub>SO<sub>4</sub> ( $c = 5 \times 10^{-3}$  M) to the ensemble in DMSO-H<sub>2</sub>O (1:1 v/v, pH = 6.8, 10 mM TrisHCl buffer) ([dye] =  $2.5 \times 10^{-5}$  M, [polymer **P2**] = 0.06 mg/mL) (left); Photograph showing color change (right).

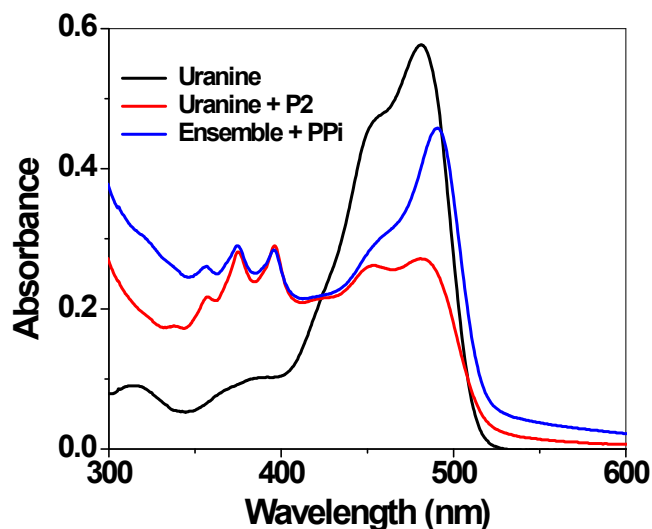

**Fig. S13.** Change in absorption intensity of Uranine dye upon addition of **P2** (0.3 mL) and dye-ensemble upon the addition of 0.6 mL of PPI ( $c = 5 \times 10^{-3}$  M) in DMSO-H<sub>2</sub>O (1:1 v/v, pH = 4.0, 10 mM TrisHCl buffer) ( $[\text{dye}] = 2.5 \times 10^{-5}$  M,  $[\text{polymer P2}] = 0.06$  mg/mL).

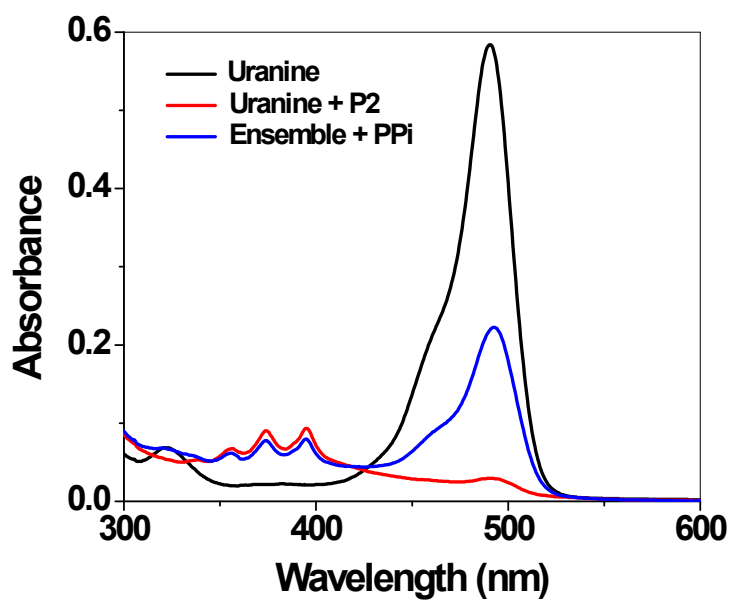

**Fig. S14.** Change in absorption intensity of Uranine dye upon addition of **P2** (0.3 mL) and dye-ensemble upon addition of 0.6 mL of PPI ( $c = 5 \times 10^{-3}$  M) in DMSO-H<sub>2</sub>O (1:1 v/v, pH = 10.0, 10 mM TrisHCl buffer) ( $[\text{dye}] = 2.5 \times 10^{-5}$  M,  $[\text{polymer P2}] = 0.06$  mg/mL).

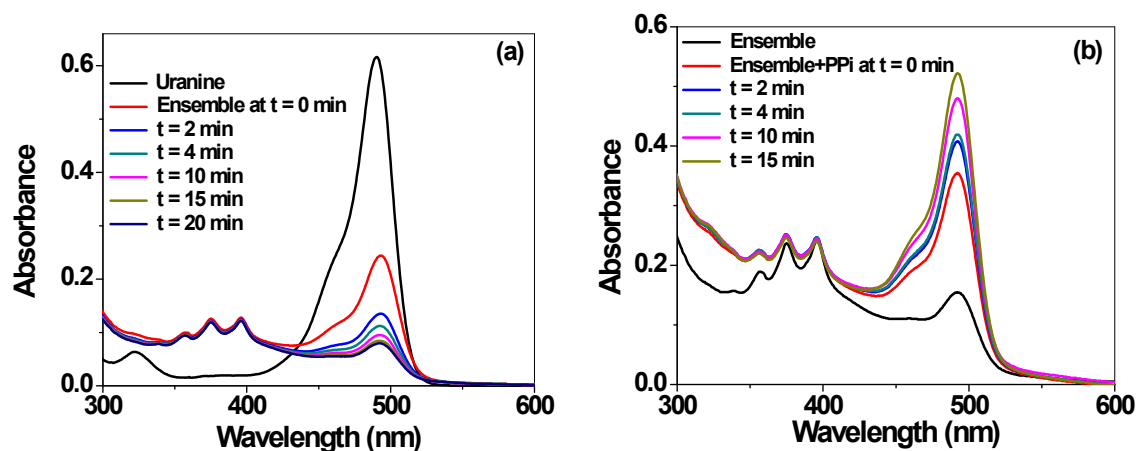

**Fig. S15.** Change in absorption intensity with time of (a) uranine dye upon addition of 0.3 mL of **P2** solution and (b) **P2**-dye ensemble after addition 0.6 ml amounts of PPI ( $c = 5 \times 10^{-3}$  M) to the ensemble in DMSO- $H_2O$  (1:1 v/v, pH = 6.8, 10 mM TrisHCl buffer) ( $[dye] = 2.5 \times 10^{-5}$  M,  $[polymer \text{ P2}] = 0.06$  mg/mL).

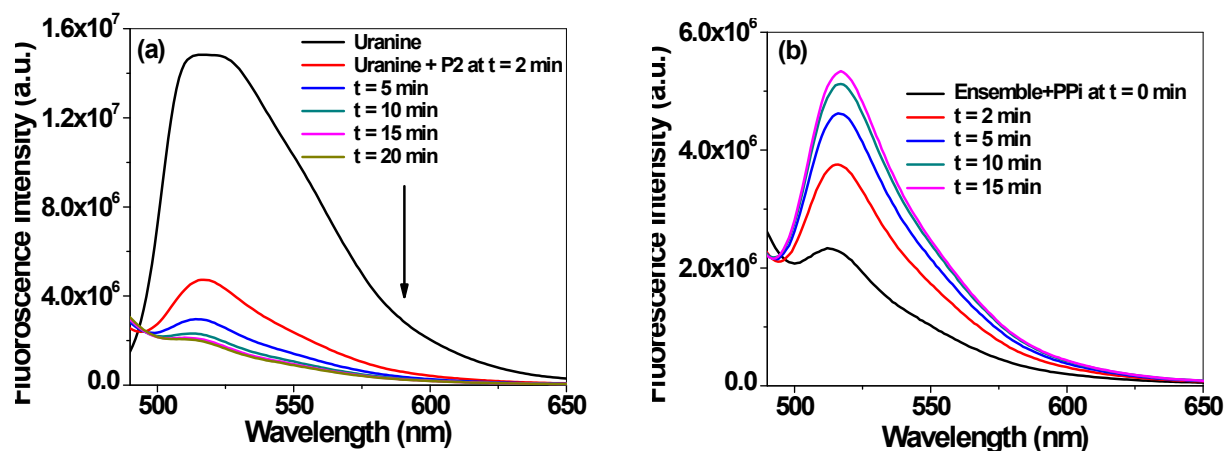

**Fig. S16.** (a) Decrease in fluorescence intensity of uranine dye upon addition of 0.3 mL of **P2** with time and (b) retrieval of fluorescence intensity of uranine dye with time upon addition of 0.6 mL of PPI ( $c = 5 \times 10^{-3}$  M) to the **P2**-dye ensemble in DMSO- $H_2O$  (1:1 v/v, pH = 6.8, 10 mM Tris HCl buffer).



# <sup>1</sup>H NMR of P1 in d<sub>6</sub>-DMSO (400 MHz)

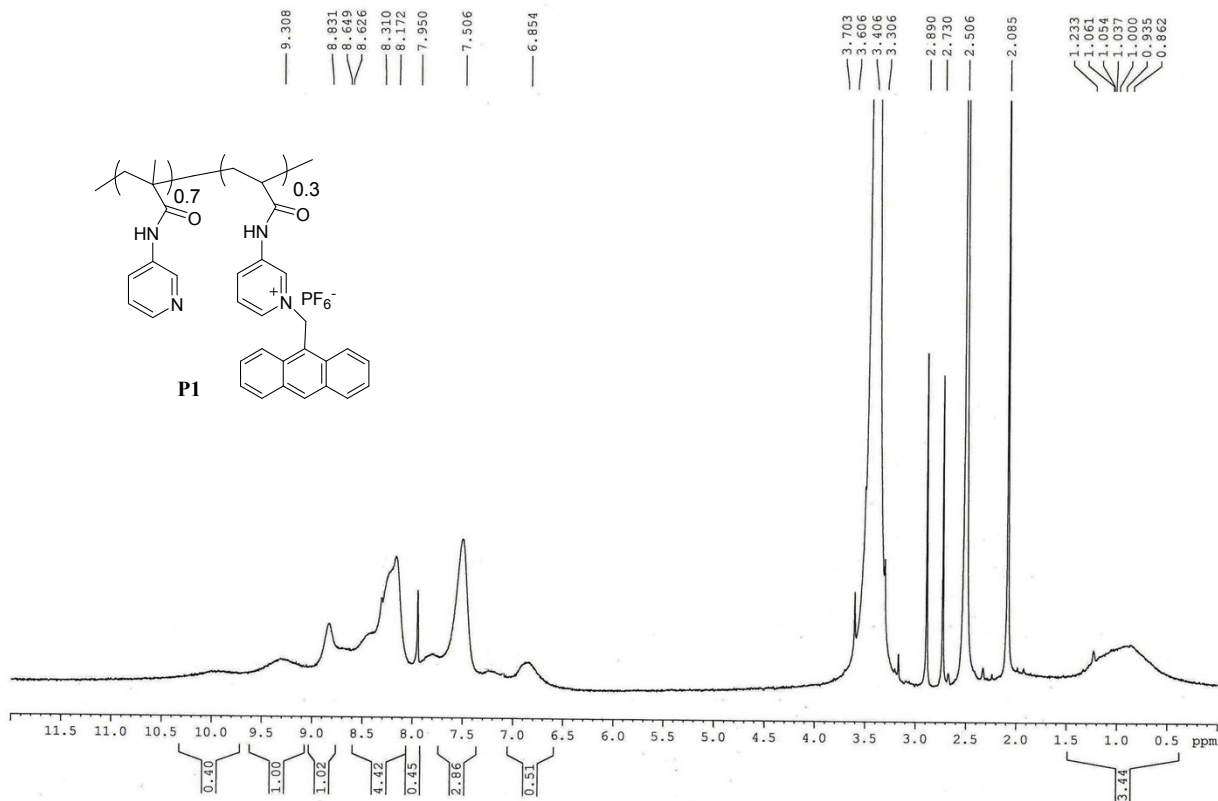

# $^{13}\text{C}$ NMR of P1 in $\text{d}_6\text{-DMSO}$ (100 MHz)

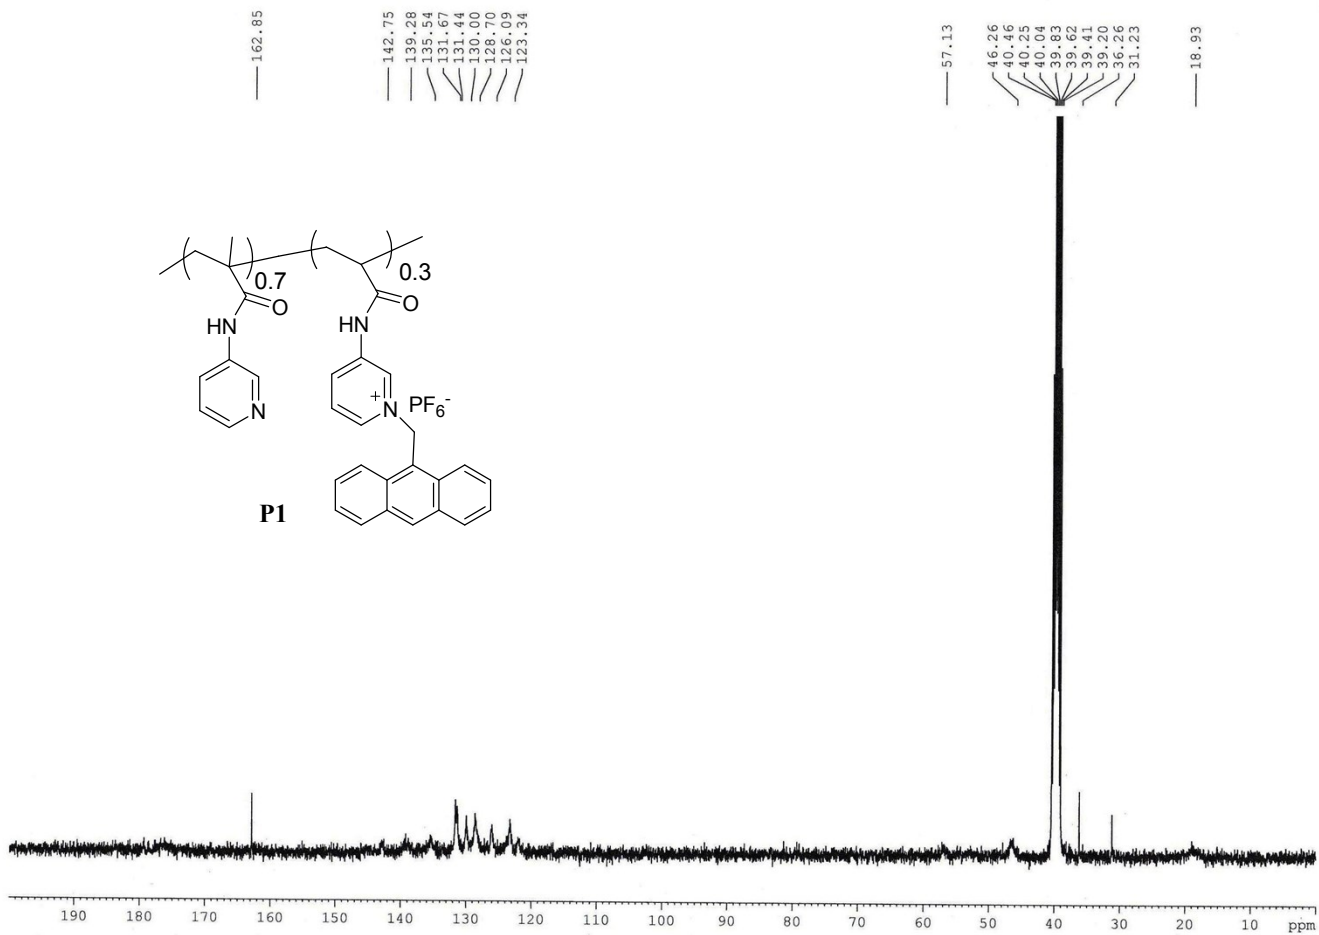

# $^1\text{H}$ NMR of M1 in $\text{CDCl}_3$ (400 MHz)

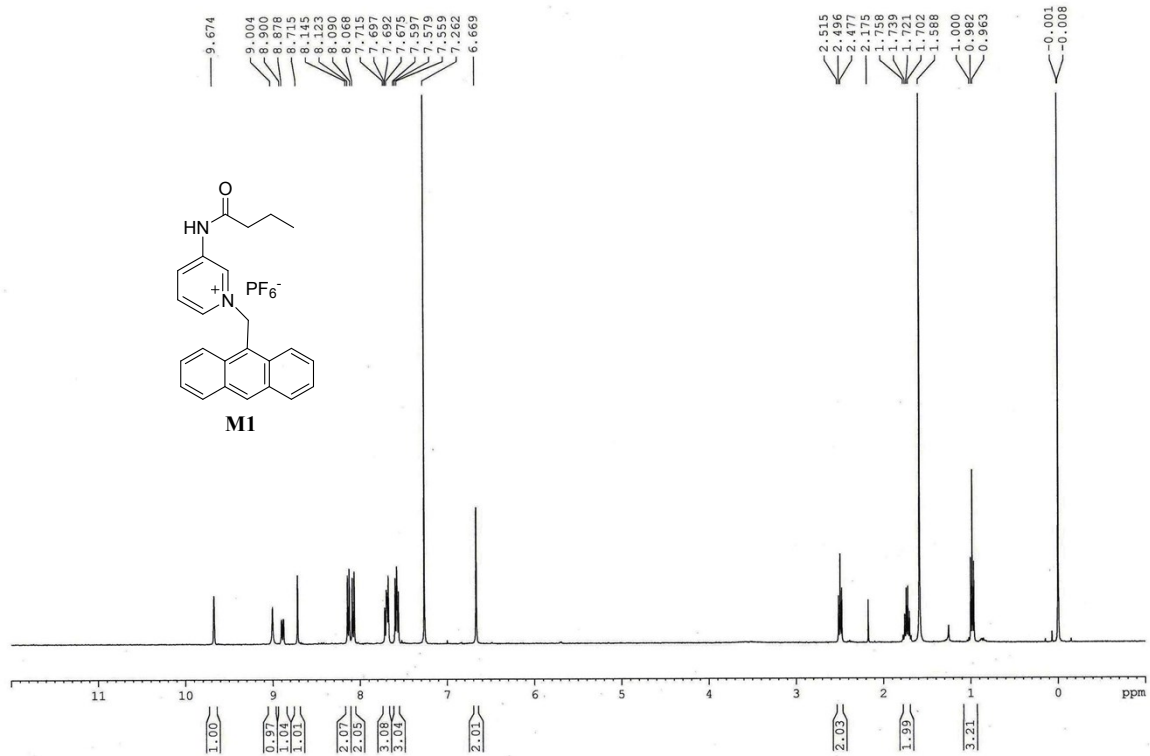

**$^{13}\text{C}$  NMR of M1 in  $\text{CDCl}_3$  (100 MHz)**

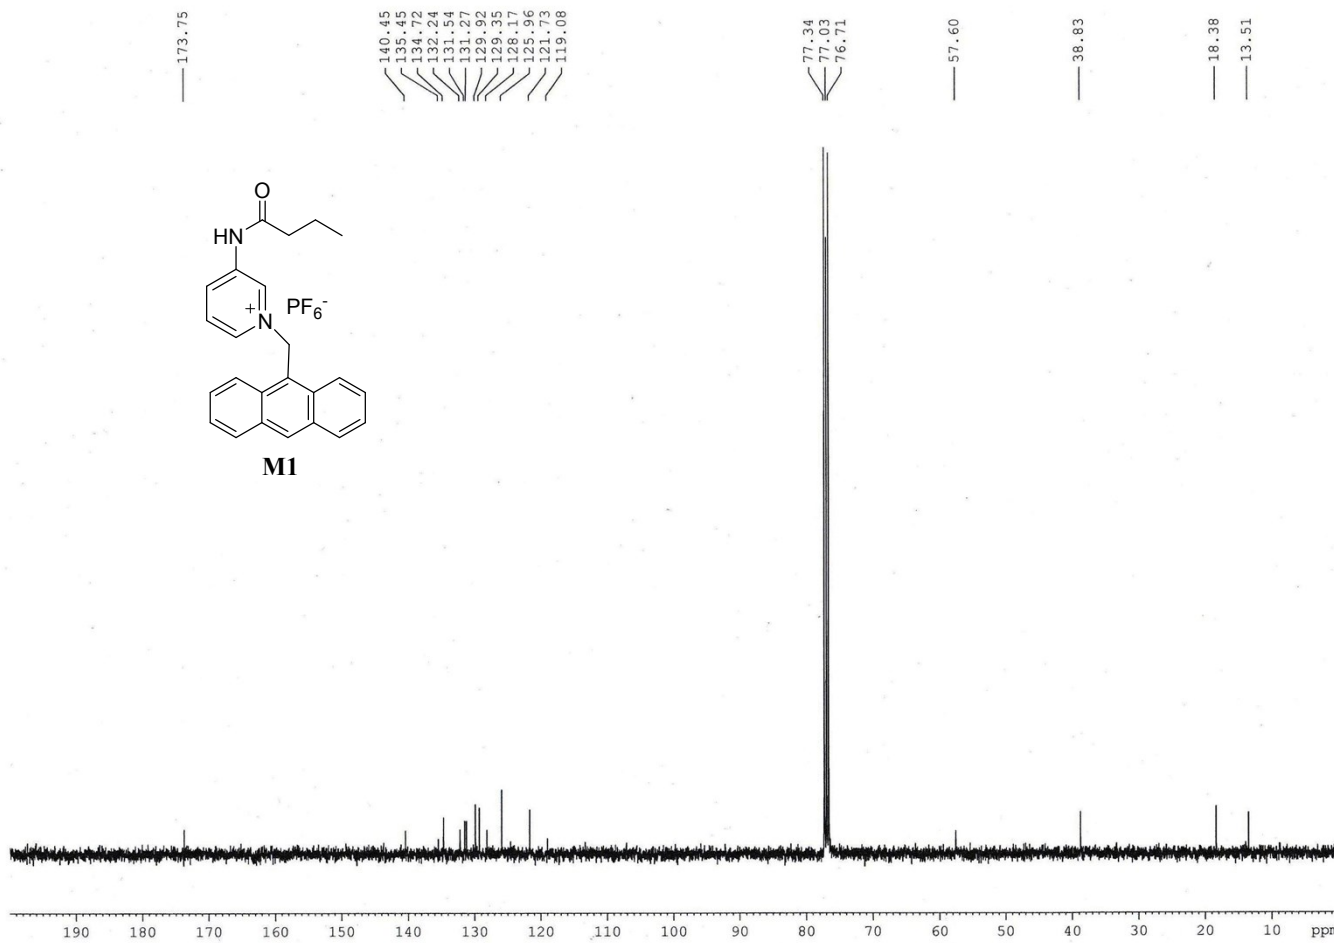



**$^{13}\text{C}$  NMR of 1 in  $\text{CDCl}_3$  (100 MHz)**

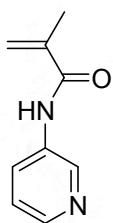

**1**

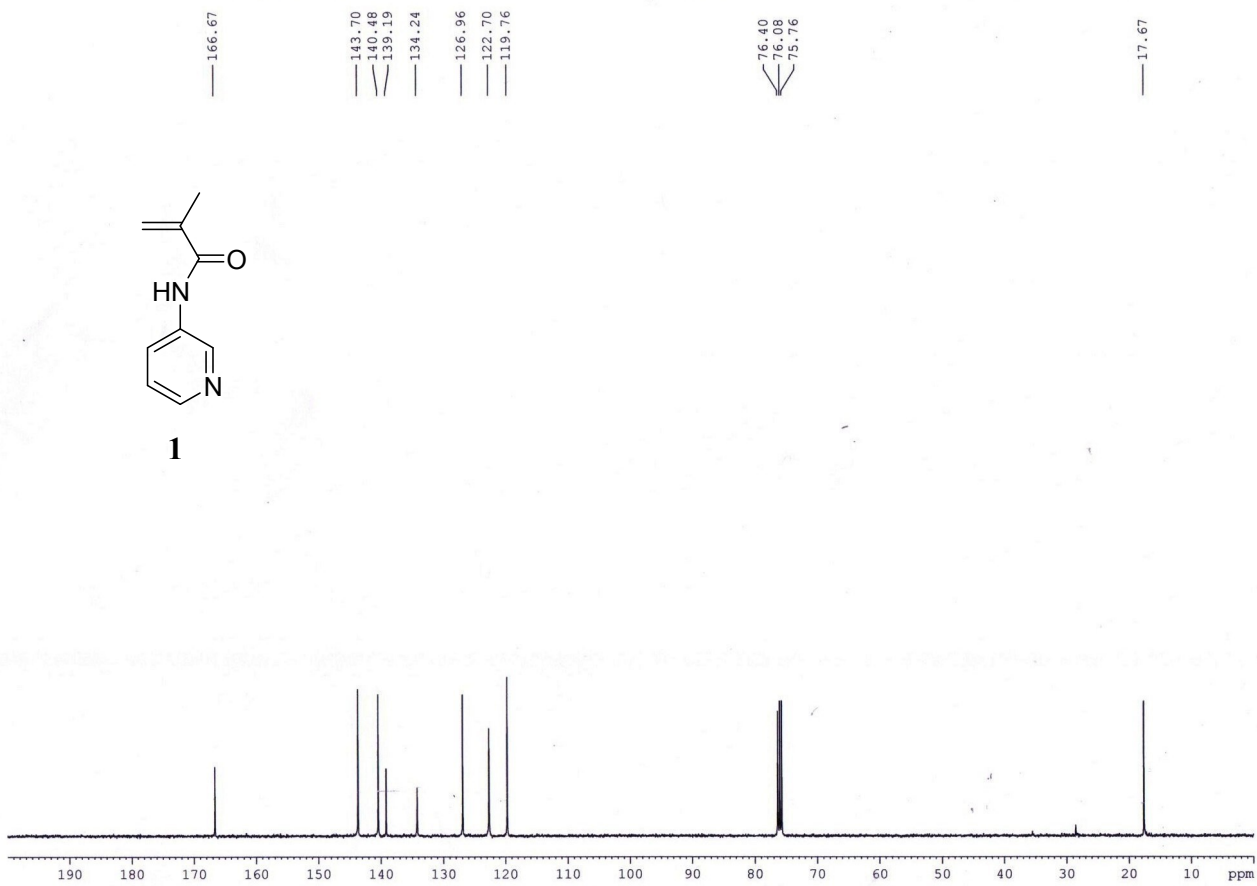

# Mass spectrum of 1

## Acquisition Parameter

|             |          |                      |          |                  |           |
|-------------|----------|----------------------|----------|------------------|-----------|
| Source Type | ESI      | Ion Polarity         | Positive | Set Nebulizer    | 0.3 Bar   |
| Focus       | Active   | Set Capillary        | 3400 V   | Set Dry Heater   | 200 °C    |
| Scan Begin  | 50 m/z   | Set End Plate Offset | -500 V   | Set Dry Gas      | 4.0 l/min |
| Scan End    | 1000 m/z | Set Charging Voltage | 2000 V   | Set Divert Valve | Source    |
|             |          | Set Corona           | 0 nA     | Set APCI Heater  | 0 °C      |

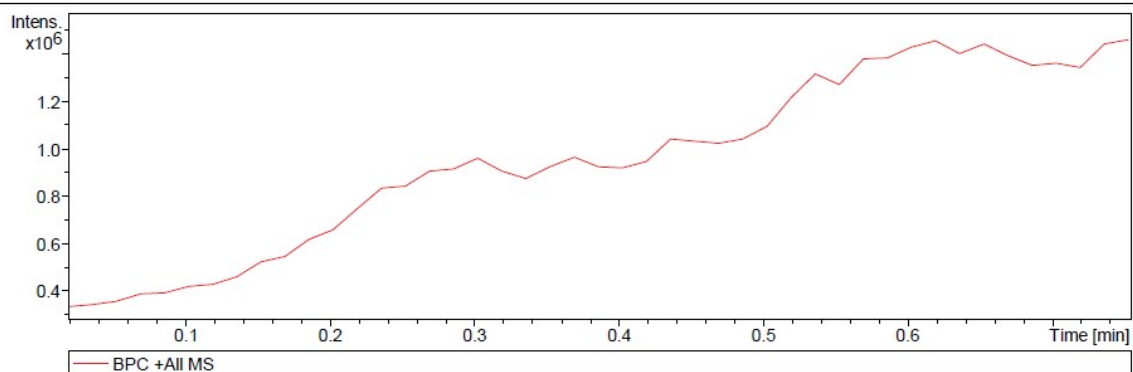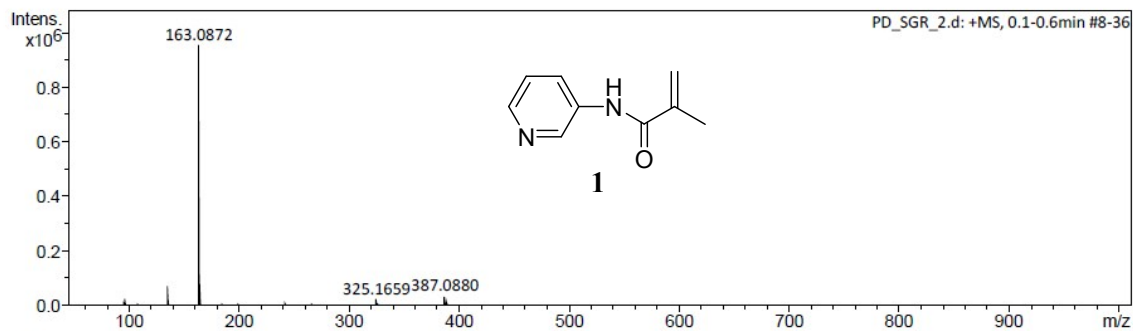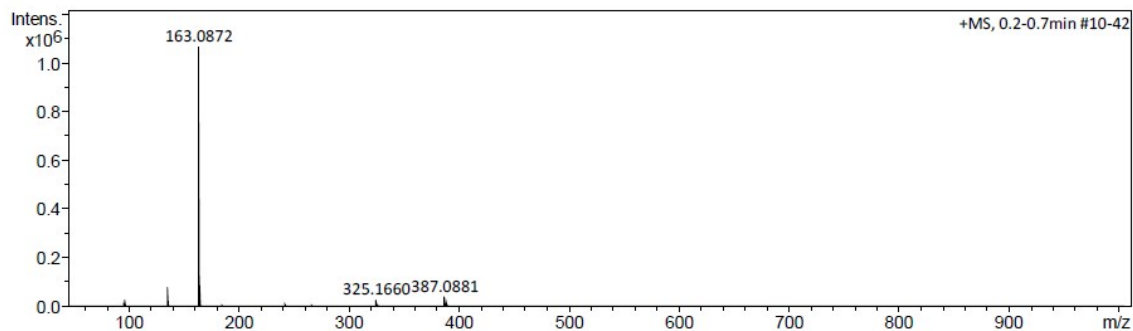

# <sup>1</sup>H NMR of P3 in d<sub>6</sub>-DMSO (400 MHz)

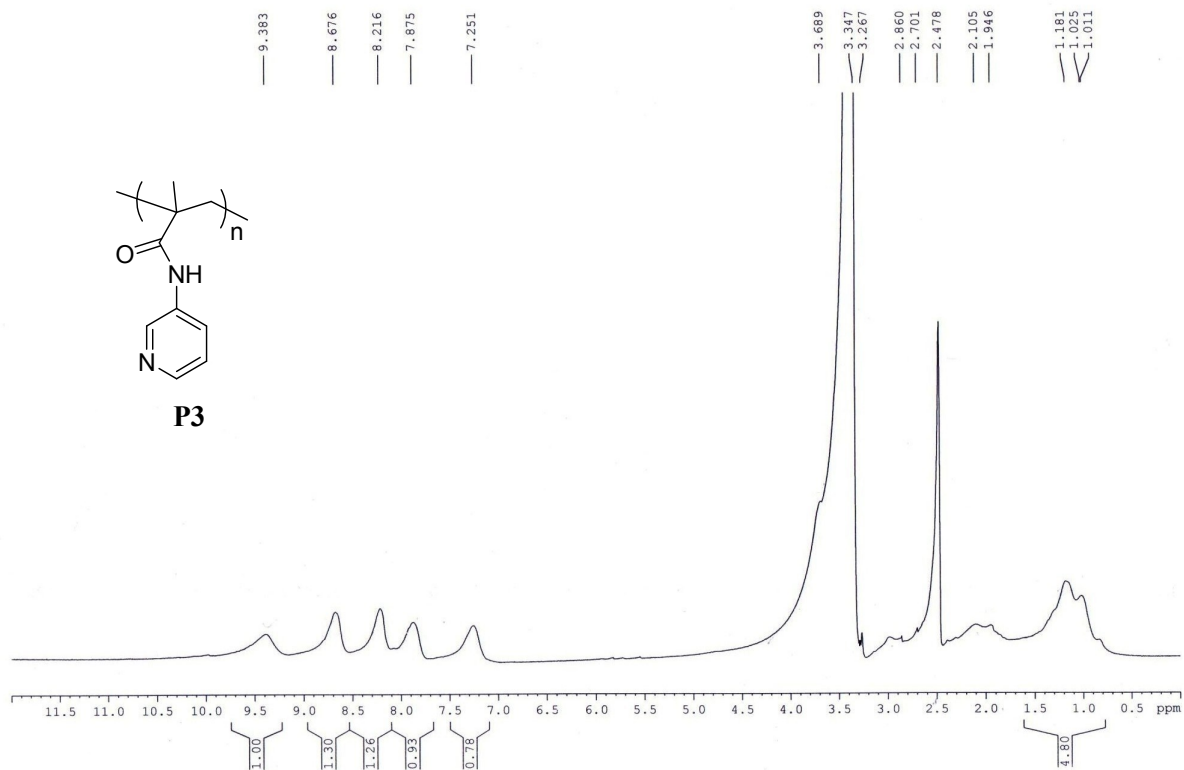



**$^{13}\text{C}$  NMR of P3 in  $\text{d}_6\text{-DMSO}$  (100 MHz)**

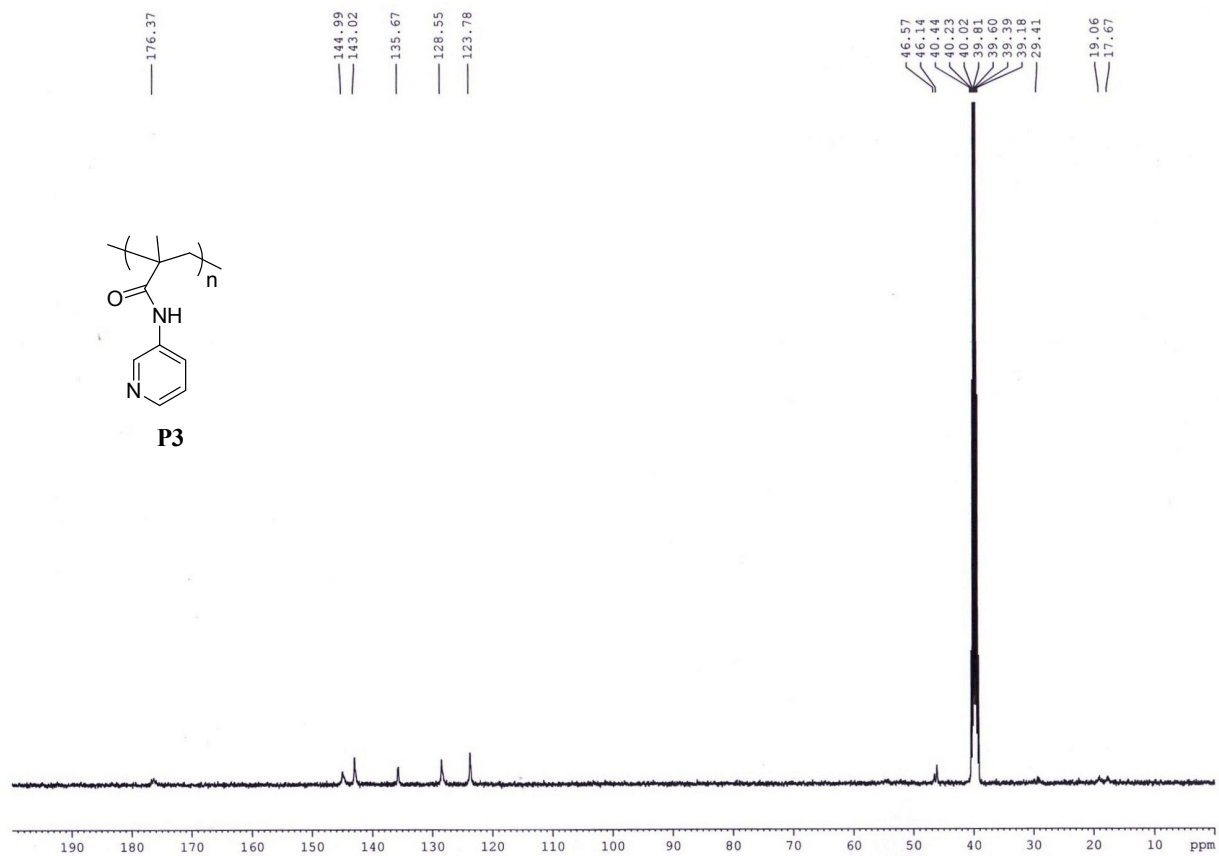

Supplement: d0ay01540g1.pdf [file d0ay01540g1.pdf]
